# Supplementary material for: Effectiveness, Safety, and Health-Related Quality of Life in Moderate-to-Severe Atopic Dermatitis Treated with Lebrikizumab: A 16-Week Nationwide Retrospective Cohort Study
Source: Springer Nature journal article supplement (doi:10.1007/s13555-025-01550-8), 2025-10-10
Supplement: MOESM1 [file 13555_2025_1550_MOESM1_ESM.pdf]

## **Effectiveness, safety, and health-related quality of life in moderate-to-severe atopic dermatitis treated with lebrikizumab: A 16-week nationwide retrospective cohort study**

Gianluca Avallone<sup>1,2\*</sup>, Andrea Bombelli<sup>1,2\*</sup>, Luigi Gargiulo<sup>3,4</sup>, Caterina Foti<sup>5</sup>, Ilaria Trave<sup>6</sup>, Mariateresa Rossi<sup>7</sup>, Elisabetta Magnaterra<sup>8,9</sup>, Flavia Pigliacelli<sup>10</sup>, Piergiorgio Malagoli<sup>11</sup>, Serena Giacalone<sup>12</sup>, Antonio Portarapillo<sup>13</sup>, Cataldo Patruno<sup>14</sup>, Natale Schettini<sup>15</sup>, Laura Bonzano<sup>16</sup>, Elena Pezzolo<sup>17</sup>, Camilla Chello<sup>18</sup>, Niccolò Gori<sup>19,20</sup>, Giovanna Brunasso<sup>21</sup>, Federica Veronese<sup>22</sup>, Michela Ortoncelli<sup>23</sup>, Ersilia Tolino<sup>24</sup>, Alan Azzolini<sup>25</sup>, Francesco Bellinato<sup>26</sup>, Katharina Hansel<sup>27</sup>, Eugenia Veronica Di Brizzi<sup>28</sup>, Carlotta Gurioli<sup>29</sup>, Maria Esposito<sup>30</sup>, Roberta Giuffrida<sup>31</sup>, Francesca Barei<sup>1</sup>, Paolo Calzari<sup>2</sup>, Anna G Burroni<sup>6</sup>, Massimo Gola<sup>8</sup>, Maria Mariano<sup>10</sup>, Maria Concetta Fagnoli<sup>10</sup>, Maddalena Napolitano<sup>13</sup>, Teresa Grieco<sup>18</sup>, Ketty Peris<sup>19,20</sup>, Paola Savoia<sup>22</sup>, Simone Ribero<sup>23</sup>, Giampiero Girolomoni<sup>26</sup>, Luca Stingeni<sup>27</sup>, Anna Balato<sup>28</sup>, Antonio Costanzo<sup>3,4</sup>, Angelo Valerio Marzano<sup>1,2</sup>, Alessandra Narcisi<sup>3,4§</sup>, Silvia Mariel Ferrucci<sup>1§</sup>

\*These authors contributed equally to this article and share first authorship

§These authors contributed equally to this article and share senior authorship

### **Corresponding author:**

Gianluca Avallone, MD

Dermatology Unit, Fondazione IRCCS Ca' Granda Ospedale Maggiore Policlinico, Via Pace, 9, 20122, Milan, Italy. Telephone: +390255031

E-mail: [gianluca.avallone2@gmail.com](mailto:gianluca.avallone2@gmail.com)

## Supplementary Material

**Table S1.** Patients' evaluation of HRQoL reported as mean DLQI scores at baseline, Week 4, and Week 16.

| DLQI categories        | Patients<br>n (%) |
|------------------------|-------------------|
| <b>Baseline</b>        |                   |
| No effect              | 0                 |
| Small effect           | 3 (3.9)           |
| Moderate effect        | 7 (9.0)           |
| Very large effect      | 18 (23.1)         |
| Extremely large effect | 20 (25.6)         |
| Missing information    | 30 (38.5)         |
| <b>Week 4</b>          |                   |
| No effect              | 9 (11.5)          |
| Small effect           | 6 (7.7)           |
| Moderate effect        | 12 (15.4)         |
| Very large effect      | 15 (19.2)         |
| Extremely large effect | 1 (1.3)           |
| Missing information    | 35 (44.9)         |
| <b>Week 16</b>         |                   |
| No effect              | 13 (16.7)         |
| Small effect           | 17 (21.8)         |
| Moderate effect        | 11 (14.1)         |
| Very large effect      | 6 (7.7)           |
| Extremely large effect | 1 (1.3)           |
| Missing information    | 30 (38.5)         |

DLQI categories were defined as follows: 0-1, "no effect on patient's life"; 2-5, "small effect on patient's life"; 6-10, "moderate effect on patient's life"; 11-20, "very large effect on patient's life"; and 21-30, "extremely large effect on patient's life". Abbreviations: DLQI, dermatology life quality index; HRQoL, health related quality of life; n, number.

**Table S2.** Experienced pruritus levels reported as mean itch-NRS scores at baseline, Week 4, and Week 16 for 78 patients.

| Itch-NRS Score      | Patients<br>n (%) |
|---------------------|-------------------|
| <b>Baseline</b>     |                   |
| 0                   | 0                 |
| 1                   | 1 (1.3)           |
| 2                   | 0                 |
| 3                   | 6 (7.7)           |
| 4                   | 1 (1.3)           |
| 5                   | 3 (3.9)           |
| 6                   | 3 (3.9)           |
| 7                   | 12 (15.4)         |
| 8                   | 26 (33.3)         |
| 9                   | 10 (12.8)         |
| 10                  | 15 (19.2)         |
| Missing information | 1 (1.3)           |
| <b>Week 4</b>       |                   |
| 0                   | 9 (11.5)          |
| 1                   | 3 (3.9)           |
| 2                   | 11 (14.1)         |
| 3                   | 8 (10.3)          |
| 4                   | 14 (18.0)         |
| 5                   | 5 (6.4)           |
| 6                   | 5 (6.4)           |
| 7                   | 3 (3.9)           |
| 8                   | 2 (2.6)           |
| 9                   | 1 (1.3)           |
| 10                  | 0                 |
| Missing information | 17 (21.8)         |
| <b>Week 16</b>      |                   |
| 0                   | 17 (21.8)         |
| 1                   | 7 (9.0)           |
| 2                   | 13 (16.7)         |
| 3                   | 12 (15.4)         |
| 4                   | 7 (9.0)           |
| 5                   | 4 (5.1)           |
| 6                   | 5 (6.4)           |
| 7                   | 5 (6.4)           |
| 8                   | 5 (6.4)           |
| 9                   | 0                 |
| 10                  | 1 (1.3)           |
| Missing information | 2 (2.6)           |

Itch-NRS categories were defined as following: 0, “no itch”; 1-2, “mild itch”; 3-6, “moderate itch”; 7-8, “severe itch”; 9-10, “very severe itch”. Abbreviations: n, number; NRS, numerical rating scale.

**Table S3.** Disease severity reported as mean IGA scores at baseline, Week 4, and Week 16.

| IGA score           | Patients<br>n (%) |
|---------------------|-------------------|
| Baseline            |                   |
| Clear               | 0                 |
| Almost Clear        | 1 (1.3)           |
| Mild                | 8 (10.3)          |
| Moderate            | 41 (52.6)         |
| Severe              | 23 (29.5)         |
| Missing information | 5 (6.4)           |
| Week 4              |                   |
| Clear               | 5 (6.4)           |
| Almost Clear        | 12 (15.4)         |
| Mild                | 26 (33.3)         |
| Moderate            | 14 (17.9)         |
| Severe              | 0                 |
| Missing information | 21 (26.9)         |
| Week 16             |                   |
| Clear               | 8 (10.3)          |
| Almost Clear        | 34 (43.6)         |
| Mild                | 16 (20.5)         |
| Moderate            | 9 (11.5)          |
| Severe              | 1 (1.3)           |
| Missing information | 10 (12.8)         |

IGA categories were defined as following: 0, “Clear”; 1, “almost clear”; 2, “mild signs”; 3, “moderate signs”; and 4, “severe signs”. Abbreviations: IGA, investigator’s global assessment; n, number.

**Table S4.** Outcomes stratified by bio/JAKi-experienced and bio/JAKi-naïve and status of patients at baseline, Week 4, and Week 16.

|                                   | Bio/JAKi-experienced<br>(n=49) | Bio/JAKi-naïve<br>(n=29) |
|-----------------------------------|--------------------------------|--------------------------|
| <b>EASI score</b>                 |                                |                          |
| Baseline                          |                                |                          |
| n                                 | 49                             | 29                       |
| Mean±SD                           | 19.2±10.9                      | 23.8±7.5                 |
| Week 4                            |                                |                          |
| n                                 | 38                             | 23                       |
| Mean±SD                           | 9.0±6.6                        | 9.2±6.8                  |
| Week 16                           |                                |                          |
| n                                 | 49                             | 29                       |
| Mean±SD                           | 5.2±4.80                       | 5.1±6.4                  |
| <b>EASI head &amp; neck score</b> |                                |                          |
| Baseline                          |                                |                          |
| n                                 | 39                             | 28                       |
| Mean±SD                           | 4.1±1.8                        | 2.8±2.2                  |
| Week 4                            |                                |                          |
| n                                 | 32                             | 24                       |
| Mean±SD                           | 2.6±2.1                        | 1.3±1.7                  |
| Week 16                           |                                |                          |
| n                                 | 40                             | 28                       |
| Mean±SD                           | 1.9±1.9                        | 1.0±1.5                  |
| <b>DLQI score</b>                 |                                |                          |
| Baseline                          |                                |                          |
| n                                 | 28                             | 20                       |
| Mean±SD                           | 17.2±7.8                       | 19.2±7.5                 |
| Week 4                            |                                |                          |
| n                                 | 24                             | 19                       |
| Mean±SD                           | 9.5±6.2                        | 7.6±6.3                  |
| Week 16                           |                                |                          |
| n                                 | 28                             | 20                       |
| Mean±SD                           | 5.9±5.4                        | 4.6±5.9                  |
| <b>Itch-NRS score</b>             |                                |                          |
| Baseline                          |                                |                          |
| n                                 | 48                             | 29                       |
| Mean±SD                           | 7.5±2.1                        | 7.9±2.0                  |
| Week 4                            |                                |                          |
| n                                 | 37                             | 24                       |
| Mean±SD                           | 3.3±2.3                        | 3.5±2.2                  |
| Week 16                           |                                |                          |
| n                                 | 47                             | 29                       |
| Mean±SD                           | 2.7±2.4                        | 3.6±2.9                  |
| <b>Sleep-NRS score</b>            |                                |                          |

|                         | Bio/JAKi-experienced<br>(n=49) | Bio/JAKi-naïve<br>(n=29) |
|-------------------------|--------------------------------|--------------------------|
| <b>Baseline</b>         |                                |                          |
| n                       | 48                             | 29                       |
| Mean±SD                 | 5.3±3.5                        | 6.3±3.2                  |
| <b>Week 4</b>           |                                |                          |
| n                       | 37                             | 24                       |
| Mean±SD                 | 2.0±2.5                        | 1.8±2.0                  |
| <b>Week 16</b>          |                                |                          |
| n                       | 47                             | 29                       |
| Mean±SD                 | 1.2±2.2                        | 2.1±2.8                  |
| <b>BSA score (%)</b>    |                                |                          |
| <b>Baseline</b>         |                                |                          |
| n                       | 32                             | 24                       |
| Mean±SD                 | 29.3±22.0                      | 35.1±20.3                |
| <b>Week 4</b>           |                                |                          |
| n                       | 22                             | 19                       |
| Mean±SD                 | 19.3±17.1                      | 13.7±7.3                 |
| <b>Week 16</b>          |                                |                          |
| n                       | 28                             | 24                       |
| Mean±SD                 | 7.4±7.8                        | 7.6±13.8                 |
| <b>IGA score, n (%)</b> |                                |                          |
| <b>Baseline</b>         |                                |                          |
| Clear                   | 0                              | 0                        |
| Almost Clear            | 1 (2.0)                        | 0                        |
| Mild                    | 6 (12.2)                       | 2 (6.9)                  |
| Moderate                | 24 (49.0)                      | 17 (58.6)                |
| Severe                  | 13 (26.5)                      | 10 (34.5)                |
| Missing information     | 5 (10.2)                       | 0                        |
| <b>Week 4</b>           |                                |                          |
| Clear                   | 4 (8.2)                        | 1 (3.5)                  |
| Almost Clear            | 7 (14.3)                       | 5 (17.2)                 |
| Mild                    | 11 (22.5)                      | 15 (51.7)                |
| Moderate                | 11 (22.5)                      | 3 (10.3)                 |
| Severe                  | 0                              | 0                        |
| Missing information     | 16 (32.7)                      | 5 (17.2)                 |
| <b>Week 16</b>          |                                |                          |
| Clear                   | 6 (12.2)                       | 2 (6.9)                  |
| Almost Clear            | 16 (32.7)                      | 18 (62.1)                |
| Mild                    | 11 (22.5)                      | 5 (17.2)                 |
| Moderate                | 6 (12.2)                       | 3 (10.3)                 |
| Severe                  | 0                              | 1 (3.5)                  |
| Missing information     | 10 (20.4)                      | 0                        |
| <b>SCORAD score</b>     |                                |                          |
| <b>Baseline</b>         |                                |                          |
| n                       | 10                             | 9                        |
| Mean±SD                 | 44.0±21.1                      | 61.2±12.0                |

|                     | Bio/JAKi-experienced<br>(n=49) | Bio/JAKi-naïve<br>(n=29) |
|---------------------|--------------------------------|--------------------------|
| Week 4              |                                |                          |
| n                   | 9                              | 9                        |
| Mean±SD             | 17.8±13.6                      | 27.4±7.6                 |
| Week 16             |                                |                          |
| n                   | 9                              | 9                        |
| Mean±SD             | 7.9±7.6                        | 17.9±16.0                |
| <b>POEM score</b>   |                                |                          |
| Baseline            |                                |                          |
| n                   | 20                             | 14                       |
| Mean±SD             | 20.3±7.1                       | 20.1±6.1                 |
| Week 4              |                                |                          |
| n                   | 13                             | 13                       |
| Mean±SD             | 7.6±5.9                        | 7.8±4.9                  |
| Week 16             |                                |                          |
| n                   | 13                             | 14                       |
| Mean±SD             | 6.3±6.0                        | 5.6±5.9                  |
| <b>ADTC score</b>   |                                |                          |
| Baseline            |                                |                          |
| n                   | 16                             | 12                       |
| Mean±SD             | 16.2±4.3                       | 16.1±5.1                 |
| Week 4              |                                |                          |
| n                   | 13                             | 12                       |
| Mean±SD             | 7.8±5.7                        | 7.3±4.8                  |
| Week 16             |                                |                          |
| n                   | 16                             | 14                       |
| Mean±SD             | 6.1±5.9                        | 3.8±2.7                  |
| <b>HADS-A score</b> |                                |                          |
| Baseline            |                                |                          |
| n                   | 11                             | 7                        |
| Mean±SD             | 7.5±6.9                        | 9.1±1.6                  |
| Week 4              |                                |                          |
| n                   | 7                              | 6                        |
| Mean±SD             | 2.4±3.1                        | 3.2±1.0                  |
| Week 16             |                                |                          |
| n                   | 10                             | 7                        |
| Mean±SD             | 2.8±3.6                        | 1.3±1.0                  |
| <b>HADS-D score</b> |                                |                          |
| Baseline            |                                |                          |
| n                   | 11                             | 7                        |
| Mean±SD             | 6.7±6.9                        | 10.3±3.6                 |
| Week 4              |                                |                          |
| n                   | 8                              | 6                        |
| Mean±SD             | 2.9±4.1                        | 5.0±2.0                  |
| Week 16             |                                |                          |

|                                  | Bio/JAKi-experienced<br>(n=49) | Bio/JAKi-naïve<br>(n=29) |
|----------------------------------|--------------------------------|--------------------------|
| n                                | 10                             | 7                        |
| Mean±SD                          | 3.6±3.5                        | 2.7±1.3                  |
| <b>Achievement of MDA, n (%)</b> |                                |                          |
| Week 4                           |                                |                          |
| No                               | 21 (42.9)                      | 17 (58.6)                |
| Yes                              | 3 (6.1)                        | 1 (3.5)                  |
| Missing information              | 25 (51.0)                      | 11 (37.9)                |
| Week 16                          |                                |                          |
| No                               | 23 (46.9)                      | 18 (62.1)                |
| Yes                              | 5 (10.2)                       | 2 (6.9)                  |
| Missing information              | 21 (42.9)                      | 9 (31.0)                 |

Abbreviations: ADCT, atopic dermatitis control tool; bio/JAKi, biologic drug or Janus kinase inhibitor; BSA, body surface area; DLQI, dermatology life quality index; EASI, eczema area and severity index; HADS-A, hospital anxiety and depression scale for anxiety; HADS-D, hospital anxiety and depression scale for depression; IGA, investigator's global assessment; MDA, minimal disease activity; ; n, number; NRS, numerical rating scale; POEM, patient-reported eczema measure; SCORAD, scoring atopic dermatitis; SD, standard deviation; .
